# Supplementary material for: Analysis of the measurements used as potency tests for the 31 US FDA-approved cell therapy products
Source: J Transl Med. 2025 Mar 4;23:259. doi: 10.1186/s12967-025-06253-4 (PMC11877884; doi:10.1186/s12967-025-06253-4)
Supplement: Supplementary file 2 — Additional file 2. [file 12967_2025_6253_MOESM2_ESM.xlsx]

## Sheet: DATA
										Genetic modifications... VCN = Vector Copy Number TIDE = Tracking of Indels by DEcomposition
	Product	Description	Potency Tests	Total Slots	Check Sum	Redacted Slots	Viability & Count	Expression	Bioassay	Genetic Modifications	Histology	Other Sources	1
1	Hemacord (2011)	Allogeneic cord blood for hematopoietic and immunologic reconstitution in patients with disorders affecting the hematopoietic system that are inherited, acquired, or result from myeloablative treatment.	FDA SBRA: i) Total nucleated cells (TNC); ii) viability of CD45+ cells; iii) viable CD34+ cell count; iv) Colony forming unit (CFU)	4	4		3	1				ASTM 2944 indicates that CFU is a way to count stem cells	2
2	Clinimmune (2012)		FDA SBRA: i) Total nucleated cells (TNC); ii) viability of total nucleated cells (TNC); iii) viable CD34+ cell count; iv) redacted	4	4	1	2.5	0.5					3
3	Ducord (2012)		FDA SBRA: i) Total nucleated cells (TNC); ii) viable nucleated cells; iii) viable CD34+ cells (flow cytometry); iv) redacted; v) redacted	5	5	2	2.5	0.5					4
4	Lifesouth (2013)		FDA SBRA: i) Total nucleated cells (TNC); ii) viable nucleated cells; iii) viable CD34+ cells (flow cytometry); iv) redacted	4	4	1	2.5	0.5					5
5	Bloodworks (2016)		FDA SBRA: i) Total nucleated cells (TNC); ii) viable nucleated cells; iii) viable CD34+ cells (flow cytometry); iv) redacted	4	4	1	2.5	0.5					6
6	Allocord (2016)		FDA SBRA: i) Total nucleated cells (TNC); ii) viable nucleated cells; iii) viable CD34+ cell count; iv) colony forming units (CFU)	4	4		3.5	0.5					7
7	Clevecord (2016)		FDA SBRA: i) Total nucleated cell number; ii) viabitity of TNC; iii) viable CD34+ cell count; iv) redacted	4	4	1	2.5	0.5					8
8	MD Anderson (2018)		FDA SBRA: i) Total CD34+ count; ii) total nucleated cell (TNC) count (per HPC, cord blood); iii) nucleated RBC; iv) viability of nucleated cells; v) viable CD34+ cells; vi) colony forming unit (CFU) assay	6	6		5	1
9	Kymriah (2017)	Autologous T-cells reprogrammed to target cells that express specific surface antigens for treating cancers (CAR T-cells)	FDA Panel Slides: i) CAR expression by flow cytometry; ii) release of IFNγ in response to CD19-expressing target cells	2	2			1	1			OTHER SOURCE: Novartis slides from panel discussion
10	Yescarta (2017)		FDA SBRA: i) Cell viability; ii) anti-CD19 CAR expression; iii) redacted; Papadouli et al., 2020: Interferon-γ production by product upon stimulation with CD19+ cells	3	3		1	1	1			OTHER SOURCE: Papadouli et al., 2020
11	Tecartus (2020)		FDA SBRA: i) Cell viability; ii) anti-CD19 CAR expression; iii) redacted	3	3	1	1	1
12	Breyanzi (2021)		FDA SBRA: i) Redacted	1	1	1
13	Abecma (2021)		FDA SBRA: i) Redacted; EMA Assessment Report: Interferon-γ production by product upon stimulation with BCMA+ cells	1	1				1			OTHER SOURCE: EMA Assessment Report
14	Carvykti (2023)		FDA SBRA: i) CAR expression from viable T cells; ii) redacted	2	2	1	0.5	0.5
15	Aucatzyl (2024)		FDA SBRA: i) Redacted	1	1	1
16	Provenge (2010)	Autologous CD54+ cells activated with PAP-GM-CSF for prostate cancer	FDA SBRA: i) Number of CD54+ cells (flow cytometry); ii) increased expression of CD54 on the surface of antigen presenting cells after culture with PAP-GM-CSF (flow cytometry)	2	2		0.5	0.5	1
17	Laviv (2011)	Autologous fibroblasts from skin punch biopsy for nasolabial fold wrinkles	FDA SBRA: i) Cell count; ii) cell viability; iii) collagen production by the cells	3	3		2	1
18	Gintuit (2012)	Allogeneic cultured keratinocytes and fibroblasts in bovine collagen for gingival defects	FDA SBRA: Histology with morphological assessments: epidermal coverage, epidermal development, basal cell layer keratinocyte viability, suprabasal cell layer keratinocyte viability, dermal thickness, fibroblast density, and matrix integrity	1	1						1
19	MACI (2016)	Autologous cultured chondrocytes on porcine collagen membrane for knee cartilage defects	FDA SBRA: i) Cell number; ii) redacted; iii) redacted; Rapko et al., 2007: PCR measurement of aggrecan gene expression	3	3	1	1	1				OTHER SOURCE: Vericel told me about their poster: Rapko et al., 2007: PCR measurement of aggrecan gene expression
20	Stratagraft (2021)	Allogeneic cultured keratinocytes and dermal fibroblasts in murine collagen for thermal burns	FDA SBRA: Redacted	1	1	1
21	Rethymic (2021)	Allogeneic processed thymus tissue for athymia	FDA SBRA: Histology-based (tissue organization, viability & retention of important cell types believed to be important for function)	1	1						1
22	Zynteglo (2022)	Autologous CD34+ cells hematopoietic stem cells (HSCs) transduced to express βA-T87Q-globin for ß-thalassemia	FDA SBRA: i) Vector copy number (VCN) (qPCR); ii) percent LVV+ cells; iii) redacted; iv) redacted; v) colony forming cells (CFC); vi) βA-T87Q-globin quantitative protein expression	6	6	2	1	2		1
23	Skysona (2022)	Autologous CD34+ hematopoietic stem cells (HSCs) transduced with adrenoleukodystrophy protein (ALDP) for cerebral adrenoleukodystrophy (CALD)	FDA SBRA: i) Vector copy number (VCN) (qPCR); ii) percent LVV+ cells; iii) redacted; iv) redacted; v) redacted; vi) percent ALDP+ cells	6	6	3		2		1
24	Omisirge (2023)	Allogeneic umbilical cord blood (UCB) cells cultured in nicotinamide to improve stemness for patients with hematologic malignancies having UCB transplantation	FDA SBRA: CD34+ cell fold-increase	1	1			1
25	Lantidra (2023)	Allogeneic pancreatic islet cellular therapy for Type 1 diabetes	FDA Advisory Committee Meeting: i) Glucose Stimulation Index (GSI): ELISA (enzyme linked immunosorbent assay) quantification of insulin release by glucose stimulated islets; ii) Islet Yield: Dithizone (DTZ) stain and microscopic quantification; iii) Viability: SYTO 13 green/ethidium bromide staining and microscopic evaluation	3	3		2		1			OTHER SOURCE: Slides from panel discussion
26	Casgevy (2023)	Autologous CD34+ HSCs gene edited to reduce BCL11A expression in erythroid lineage cells for treating ß-thalassemia in children	i) On-target editing frequency (tracking of indels by decomposition, TIDE); ii) redacted; iii) redacted.	3	3	2				1
27	Lyfgenia (2023)	Autologous HSCs containing functional copies of a modified β-globin gene for sickle cell disease	i) Vector copy number (VCN); ii) redacted, iii) redacted; iv) redacted; v) redacted; vi) βA-T87Q-globin quantitative protein expression.	6	6	4		1		1
28	Amtagvi (2024)	Autolologous T-cell therapy made of ex vivo-expanded lymphocytes harvested from patient tumors for melanoma	i) redacted, ii) redacted, iii) redacted, iv) redacted, v) dose (total viable cells), vi) redacted and vii) redacted.	7	7	6	1
29	Lenmeldy (2024)	Autologous HSCs expressing the human arylsulfatase (ARSA) gene for treating metachromatic leukodystrophy in children	i) viability (%); ii) vector copy number; iii) vector copy number (calculation); iv) transduction efficiency; v) transgene function (arylsulfatase A (ARSA) activity); vi) redacted; vii) redacted; viii) redacted	8	8	3	1	2		2
30	Tecelra (2024)	Autologous T cells genetically modified with lentiviral vector to express a T cell receptor (TCR) specific for human MAGE-A4 for treating synovial sarcoma	i) Cytotoxic activity (cytotoxicity assay with flow cytometry)	1	1				1
31	Ryoncil (2024)	Allogeneic culture-expanded mesenchymal stromal cells (MSCs) isolated from the bone marrow of healthy human adult donors	i) interleukin-2 receptor alpha (IL-2Rα) inhibition bioassay; ii) redacted; iii) cell viability; iv) cell concentration	4	4	1	2		1			Other Source: FDA Document, BLA Clinical and Clinical Pharmacology Review and Evaluation, BLA 125706/0, Ryoncil, FDA. Accessed January 27, 2025: https://www.fda.gov/vaccines-blood-biologics/cellular-gene-therapy-products/ryoncil
			sum	104	104	33	37	19	7	6	2
			mean	3.35484
			Stdev	1.99246
			count (n)	31		18	19	20	7	5	2
			first quartile	1.5
			median	3
			third quartile	4
			percent of the 99 slots that are in this category		1	0.317308	0.355769	0.182692	0.0673077	0.0576923	0.0192308
			percent of CTPs that cite the potency test		2.29032	0.580645	0.612903	0.645161	0.225806	0.16129	0.0645161
				# of potency tests/CTP
				mean	SD	Count
			8 hematopoietic stem cell cord blood: Hemacord, Clinimmune, Ducord, Lifesouth, Bloodworks, Allocord, Clevecord, MD Anderson	4.375	0.744024	8
			7 CAR T-cell products: Kymriah, Yescarta, Tecartus, Breyanzi, Abecma, Carvykti, Aucatzyl	1.85714	0.899735	7
			5 TE products: Gintuit, MACI, Stratagraft, Rethymic, Lantidra	1.8	1.09545	5
			14 Allogeneic: Hemacord, Clinimmune, Ducord, Lifesouth, Bloodworks, Allocord, Clevecord, MD Anderson, Gintuit, Stratagraft, Rethymic, Omisirge, Lantidra, Ryoncil	3.28571	1.63747	14
			17 Autologous: Kymriah, Yescarta, Tecartus, Breyanzi, Abecma, Carvykti, Aucatzyl, Provenge, Laviv, MACI, Zynteglo, Skysona, Casgevy, Lyfgenia, Amtagvi, Lenmeldy, Tecelra	3.41176	2.29289	17
			Genetically modified products	3.30769	2.3939	13
			Non-genetically modified products	3.38889	1.71974	18
			Blood-derived CTPs: Hemacord, Clinimmune, Ducord, Lifesouth, Bloodworks, Allocord, Clevecord, MD Anderson, Kymriah, Yescarta, Tecartus, Breyanzi, Abecma, Carvykti, Aucatzyl, Provenge, Zynteglo, Skysona, Omisirge, Casgevy, Lyfgenia, Amtagvi, Lenmeldy, Tecelra	3.66667	2.07818	24
			Non-blood derived CTPs: Laviv, Gintuit, MACI, Stratagraft, Rethymic, Lantidra, Ryoncil	2.28571	1.25357	7

## Sheet: Histogram
	Bin	Frequency
	1	8
	2	3
	3	6
	4	7
	5	1
	6	4
	7	1
	8	1
	More	0
	Check sum	31

## Sheet: Slope P-value
SUMMARY OUTPUT
Regression Statistics
Multiple R	0.046554
R Square	0.00216727
Adjusted R Square	-0.0322408
Standard Error	2.02432
Observations	31
ANOVA
	df	SS	MS	F	Significance F
Regression	1	0.258115	0.258115	0.0629875	0.803605
Residual	29	118.839	4.09788
Total	30	119.097
	Coefficients	Standard Error	t Stat	P-value	Lower 95%	Upper 95%	Lower 95.0%	Upper 95.0%
Intercept	-36.1387	157.362	-0.229653	0.819973	-357.98	285.703	-357.98	285.703
X Variable 1	0.0195638	0.0779516	0.250973	0.803605	-0.139865	0.178993	-0.139865	0.178993

## Sheet: Potency Test per Product per Yr
		1	2	3	4	5	6	7	8	9	10	11	12	13	14	15	16	17	18	19	20	21	22	23	24	25	26	27	28	29	30	31
		Hemacord (2011)	Clinimmune (2012)	Ducord (2012)	Lifesouth (2013)	Bloodworks (2016)	Allocord (2016)	Clevecord (2016)	MD Anderson (2018)	Kymriah (2017)	Yescarta (2017)	Tecartus (2020)	Breyanzi (2021)	Abecma (2021)	Carvykti (2023)	Provenge (2010)	Laviv (2011)	Gintuit (2012)	MACI (2016)	Stratagraft (2021)	Rethymic (2021)	Zynteglo (2022)	Skysona (2022)	Omisirge (2023)	Lantidra (2023)	Casgevy (2023)	Lyfgenia (2023)	Amtagvi (2024)	Lenmeldy (2024)	Tecelra (2024)	Aucatzyl (2024)	Ryoncil (2024)
		4	4	5	4	4	4	4	6	2	3	3	1	1	2	2	3	1	3	1	1	6	6	1	3	3	6	7	8	1	1	4	SUM	Count			year	# potency tests	product			year	# potency tests
	2010															2																	2	1			2010	2	Provenge (2010)			2010	2
	2011	4															3																3.5	2			2011	4	Hemacord (2011)			2011	4
	2012		4	5														1															3.33333	3			2011	3	Laviv (2011)			2011	3
	2013				4																												4	1			2012	4	Clinimmune (2012)			2012	4
	2014																																	0			2012	5	Ducord (2012)			2012	5
	2015																																	0			2012	1	Gintuit (2012)			2012	1
	2016					4	4	4											3														3.75	4			2013	4	Lifesouth (2013)			2013	4
	2017									2	3																						2.5	2			2014					2016	4
	2018								6																								6	1			2015					2016	4
	2019																																	0			2016	4	Bloodworks (2016)			2016	4
	2020											3																					3	1			2016	4	Allocord (2016)			2016	3
	2021												1	1						1	1												1	4			2016	4	Clevecord (2016)			2017	2
	2022																					6	6										6	2			2016	3	MACI (2016)			2017	3
	2023														2									1	3	3	6						3	5			2017	2	Kymriah (2017)			2018	6
	2024																											7	8	1	1	4	5.33333	3			2017	3	Yescarta (2017)			2020	3
	Check sum	0	0	0	0	0	0	0	0	0	0	0	0	0	0	0	0	0	0	0	0	0	0	0	0	0	0	0	0	0							2018	6	MD Anderson (2018)			2021	1
																																					2019					2021	1
																																					2020	3	Tecartus (2020)			2021	1
																																					2021	1	Breyanzi (2021)			2021	1
																																					2021	1	Abecma (2021)			2022	6
																																					2021	1	Stratagraft (2021)			2022	6
																																					2021	1	Rethymic (2021)			2023	2
																																					2022	6	Zynteglo (2022)			2023	1
																																					2022	6	Skysona (2022)			2023	3
																																					2023	2	Carvykti (2023)			2023	3
																																					2023	1	Omisirge (2023)			2023	6
																																					2023	3	Lantidra (2023)			2024	7
																																					2023	3	Casgevy (2023)			2024	8
																																					2023	6	Lyfgenia (2023)			2024	1
																																					2024	7	Amtagvi (2024)			2024	1
																																					2024	8	Lenmeldy (2024)			2024	4
																																					2024	1	Tecelra(2024)		Check sum	31	104
																																					2024	1	Aucatzyl (2024)
																																					2024	4	Ryoncil (2024)
																																				Check sum	31	104

## Sheet: Pie Charts
							Genetic modifications: VCN = Vector Copy Number TIDE = Tracking of Indels by DEcomposition
				Viability & Count	Expression	Bioassay	Genetic Modifications	Histology	Redacted
	Potency Tests	Total Slots	Check Sum	Viability & count	Expression	Bioassay	Genetic Modification	Histology	Redacted
	sum	104	104	37	19	7	6	2	33
	count (n)	31	71	19	20	7	5	2	18
	percent of the 104 slots that are in this category (including redacted)		1	0.355769	0.182692	0.0673077	0.0576923	0.0192308	0.317308
	percent of the 71 slots that are in this category (excluding redacted)	71	1	0.521127	0.267606	0.0985915	0.084507	0.028169
	percent of CTPs that cite the potency test		2.29032	0.612903	0.645161	0.225806	0.16129	0.0645161	0.580645

## Sheet: Upset Plot
										2	2	3	3	2	1	1	1	1	2	1
								Viability & count	V	V	V	V	V				V
								Expression	E	E		E	E	E				E	E
								Bioassay	B		B	B			B				B
								Genetic mod.	G				G	G						G
								Histology	H							H					Check sum
						Genetic modifications... VCN = Vector Copy Number TIDE = Tracking of Indels by DEcomposition
	Potency Tests	Product	Viability & Count	Expression	Bioassay	Genetic Modification	Histology
1	FDA SBRA: i) Total nucleated cells (TNC); ii) viability of CD45+ cells; iii) viable CD34+ cell count; iv) Colony forming unit (CFU)	Hemacord	3	1						1											1
2	FDA SBRA: i) Total nucleated cells (TNC); ii) viability of total nucleated cells (TNC); iii) viable CD34+ cell count; iv) redacted	Clinimmune	2.5	0.5						1											1
3	FDA SBRA: i) Total nucleated cells (TNC); ii) viable nucleated cells; iii) viable CD34+ cells (flow cytometry); iv) redacted; v) redacted	Ducord	2.5	0.5						1											1
4	FDA SBRA: i) Total nucleated cells (TNC); ii) viable nucleated cells; iii) viable CD34+ cells (flow cytometry); iv) redacted	Lifesouth	2.5	0.5						1											1
5	FDA SBRA: i) Total nucleated cells (TNC); ii) viable nucleated cells; iii) viable CD34+ cells (flow cytometry); iv) redacted	Bloodworks	2.5	0.5						1											1
6	FDA SBRA: i) Total nucleated cells (TNC); ii) viable nucleated cells; iii) viable CD34+ cell count; iv) colony forming units (CFU)	Allocord	3.5	0.5						1											1
7	FDA SBRA: i) Total nucleated cell number; ii) viabitity of TNC; iii) viable CD34+ cell count; iv) redacted	Clevecord	2.5	0.5						1											1
8	FDA SBRA: i) Total CD34+ count; ii) total nucleated cell (TNC) count (per HPC, cord blood); iii) nucleated RBC; iv) viability of nucleated cells; v) viable CD34+ cells; vi) colony forming unit (CFU) assay	MD Anderson	5	1						1											1
9	FDA Panel Slides: i) CAR expression by flow cytometry; ii) release of IFNγ in response to CD19-expressing target cells	Kymriah		1	1														1		1
10	FDA SBRA: i) Cell viability; ii) anti-CD19 CAR expression; iii) redacted; Papadouli et al., 2020: Interferon-γ production by product upon stimulation with CD19+ cells	Yescarta	1	1	1							1									1
11	FDA SBRA: i) Cell viability; ii) anti-CD19 CAR expression; iii) redacted	Tecartus	1	1						1											1
12	FDA SBRA: i) Redacted	Breyanzi																			0
13	FDA SBRA: i) Redacted; EMA Assessment Report: Interferon-γ production by product upon stimulation with BCMA+ cells	Abecma			1										1						1
14	FDA SBRA: i) CAR expression from viable T cells; ii) redacted	Carvykti	0.5	0.5						1											1
15	i) Redacted	Aucatzyl
16	FDA SBRA: i) Number of CD54+ cells (flow cytometry); ii) increased expression of CD54 on the surface of antigen presenting cells after culture with PAP-GM-CSF (flow cytometry)	Provenge	0.5	0.5	1							1									1
17	FDA SBRA: i) Cell count; ii) cell viability; iii) collagen production by the cells	Laviv	2	1						1											1
18	FDA SBRA: Histology with morphological assessments: epidermal coverage, epidermal development, basal cell layer keratinocyte viability, suprabasal cell layer keratinocyte viability, dermal thickness, fibroblast density, and matrix integrity	Gintuit					1									1					1
19	FDA SBRA: i) Cell number; ii) redacted; iii) redacted; Rapko et al., 2007: PCR measurement of aggrecan gene expression	MACI	1	1						1											1
20	FDA SBRA: Redacted	Stratagraft																			0
21	FDA SBRA: Histology-based (tissue organization, viability & retention of important cell types believed to be important for function)	Rethymic					1									1					1
22	FDA SBRA: i) Vector copy number (VCN) (qPCR); ii) percent LVV+ cells; iii) redacted; iv) redacted; v) colony forming cells (CFC); vi) βA-T87Q-globin quantitative protein expression	Zynteglo	1	2		1							1								1
23	FDA SBRA: i) Vector copy number (VCN) (qPCR); ii) percent LVV+ cells; iii) redacted; iv) redacted; v) redacted; vi) percent ALDP+ cells	Skysona		2		1								1							1
24	FDA SBRA: CD34+ cell fold-increase	Omisirge		1														1			1
25	FDA Advisory Committee Meeting: i) Glucose Stimulation Index (GSI): ELISA (enzyme linked immunosorbent assay) quantification of insulin release by glucose stimulated islets; ii) Islet Yield: Dithizone (DTZ) stain and microscopic quantification; iii) Viability: SYTO 13 green/ethidium bromide staining and microscopic evaluation	Lantidra	2		1						1										1
26	i) On-target editing frequency (tracking of indels by decomposition, TIDE); ii) redacted; iii) redacted.	Casgevy				1														1	1
27	i) Vector copy number (VCN); ii) redacted, iii) redacted; iv) redacted; v) redacted; vi) βA-T87Q-globin quantitative protein expression.	Lyfgenia		1		1								1							1
28	i) redacted, ii) redacted, iii) redacted, iv) redacted, v) dose (total viable cells), vi) redacted and vii) redacted.	Amtagvi	1														1				1
29	i) viability (%); ii) vector copy number; iii) vector copy number (calculation); iv) transduction efficiency; v) transgene function (arylsulfatase A (ARSA) activity); vi) redacted; vii) redacted; viii) redacted	Lenmeldy	1	2		2							1								1
30	i) “Cytotoxic activity (cytotoxicity assay with flow cytometry)”	Tecelra	1	2		2									1						1
31	i) interleukin-2 receptor alpha (IL-2Rα) inhibition bioassay; ii) redacted; iii) cell viability; iv) cell concentration	Ryoncil	2		1						1										1
										12	2	2	2	2	2	2	1	1	1	1	28	Check sum	28
																					28	Check sum
	Potency Tests		Viability & Count	Expression	Bioassay	Genetic mod.	Histology
	count (n)		19	20	7	5	2			19		2		5	7	20

## Sheet: Each Test by Year
	Product	Total Slots	Redacted Slots	Viability & Count	Expression	Bioassay	Genetic Modification	Histology		Year	Viability & count		Year	Expression		Year	Bioassay		Year	Genetic mod.		Year	Histology		Year	Redacted		Product	Year	# of Approved CTPs			Product	Total Slots	Year	# of Potency Tests	Total Sum of Potency Tests	Year	# of Potency Tests		Year	Cumulative (# of potency tests)
1	Hemacord (2011)	4		3	1					2010	0		2010	0		2010.04	0		2022	0		2012.04	0		2011.97	0			2009.97	0			Provenge (2010)	2	2010	2		2010	2		2010	0
2	Clinimmune (2012)	4	1	2.5	0.5					2010	0.5		2010	0.5		2010.04	1		2022	1		2012.04	1		2011.97	1		Provenge	2009.97	1			Hemacord (2011)	4				2011	7		2010	2
3	Ducord (2012)	5	2	2.5	0.5					2011	0.5		2011	0.5		2017	1		2022	2		2021	1		2011.97	3			2011	1			Laviv (2011)	3	2011	7		2012	10		2011	2
4	Lifesouth (2013)	4	1	2.5	0.5					2011	3.5		2011	1.5		2017	2		2023	2		2021	2		2013	3		Hemacord	2011	2			Clinimmune (2012)	4				2013	4		2011	9
5	Bloodworks (2016)	4	1	2.5	0.5					2011	5.5		2011	2.5		2017	3		2023	3		2026	2		2013	4		Laviv	2011	3			Ducord (2012)	5				2016	15		2012	9
6	Allocord (2016)	4		3.5	0.5					2012	5.5		2012	2.5		2021	3		2023	4					2016	4			2012	3			Gintuit (2012)	1	2012	10		2017	5		2012	19
7	Clevecord (2016)	4	1	2.5	0.5					2012	8		2012	3		2021	4		2024	4					2016	5		Clinimmune	2012	4			Lifesouth (2013)	4	2013	4		2018	6		2013	19
8	MD Anderson (2018)	6		5	1					2012	10.5		2012	3.5		2023	4		2024	5.9					2016	6		Ducord	2012	5			MACI (2016)	3				2020	3		2013	23
9	Kymriah (2017)	2			1	1				2013	10.5		2013	3.5		2023	5		2026	5.9					2016	7		Gintuit	2012	6			Bloodworks (2016)	4				2021	4		2016	23
10	Yescarta (2017)	3		1	1	1				2013	13		2013	4		2024	5								2020	7			2013	6			Allocord (2016)	4				2022	12		2016	38
11	Tecartus (2020)	3	1	1	1					2016	13		2016	4		2024	6								2020	8		Lifesouth	2013	7			Clevecord (2016)	4	2016	15		2023	15		2017	38
12	Breyanzi (2021)	1	1							2016	15.5		2016	4.5		2024	7								2021	8			2016	7			Kymriah (2017)	2				2024	16		2017	43
13	Abecma (2021)	1				1				2016	19		2016	5		2026	7								2021	9		Bloodworks	2016	8			Yescarta (2017)	3	2017	5					2018	43
14	Carvykti (2023)	2	1	0.5	0.5					2016	21.5		2016	5.5											2021	10		Allocord	2016	9			MD Anderson (2018)	6	2018	6					2018	49
15	Aucatzyl (2024)	1	1							2016	22.5		2016	6.5											2022	10		Clevecord	2016	10			Tecartus (2020)	3	2020	3					2020	49
16	Provenge (2010)	2		0.5	0.5	1				2017	22.5		2017	6.5											2022	12		MACI	2016	11			Breyanzi (2021)	1							2020	52
17	Laviv (2011)	3		2	1					2017	23.5		2017	7.5											2022	15			2017	11			Abecma (2021)	1							2021	52
18	Gintuit (2012)	1						1		2018	23.5		2017	8.5											2023	15		Kymriah	2017	12			Stratagraft (2021)	1							2021	56
19	MACI (2016)	3	1	1	1					2018	28.5		2018	8.5											2023	17		Yescarta	2017	13			Rethymic (2021)	1	2021	4					2022	56
20	Stratagraft (2021)	1	1							2020	28.5		2018	9.5											2023	21			2018	13			Zynteglo (2022)	6							2022	68
21	Rethymic (2021)	1						1		2020	29.5		2020	9.5											2023	22		MD Anderson	2018	14			Skysona (2022)	6	2022	12					2023	68
22	Zynteglo (2022)	6	2	1	2		1			2022	29.5		2020	10.5											2024	22			2020	14			Carvykti (2023)	2							2023	83
23	Skysona (2022)	6	3		2		1			2022	30.5		2022	10.5											2024	28		Tecartus	2020	15			Omisirge (2023)	1							2024	83
24	Omisirge (2023)	1			1					2023	30.5		2022	12.5											2024	33			2021	15			Lantidra (2023)	3							2024	104
25	Lantidra (2023)	3		2		1				2023	31		2022	14.5											2026	33		Breyanzi	2021	16			Casgevy (2023)	3							2026	104
26	Casgevy (2023)	3	2				1			2023	33		2023	14.5														Abecma	2021	17			Lyfgenia (2023)	6	2023	15
27	Lyfgenia (2023)	6	4		1		1			2024	33		2023	15														Stratagraft	2021	18			Amtagvi (2024)	7
28	Amtagvi (2024)	7	6	1						2024	34		2023	16														Rethymic	2021	19			Lenmeldy (2024)	8
29	Lenmeldy (2024)	8	3	1	2		2			2024	35		2023	17															2022	19			Tecelra (2024)	1	2024	16
30	Tecelra (2024)	1				1				2024	36		2024	17														Zynteglo	2022	20					check sum=>	99
31	Ryoncil (2024)	4	1	2		1				2024	37		2024	19														Skysona	2022	21
										2024	37		2027	19															2023	21
										2026	37																	Carvykti	2023	22
																												Omisirge	2023	23
																												Lantidra	2023	24
																												Casgevy	2023	25
																												Lyfgenia	2023	26
																													2024	26
																												Amtagvi	2024	27
																												Lenmeldy	2024	28
																												Tecelra	2024	29
																												Aucatzyl	2024	30
																												Ryoncil	2024	31
																													2026	31

## Sheet: Could have Bioassay
											Genetic modifications... VCN = Vector Copy Number TIDE = Tracking of Indels by DEcomposition
	Bioassay	Product	Description	Potency Tests	Total Slots	Check Sum	Redacted Slots	Viability & Count	Expression	Bioassay	Genetic Modifications	Histology	Other Sources	1
1	NO Fully Disclosed	Hemacord (2011)	For hematopoietic and immunologic reconstitution in patients with disorders affecting the hematopoietic system that are inherited, acquired, or result from myeloablative treatment.	FDA SBRA: i) Total nucleated cells (TNC); ii) viability of CD45+ cells; iii) viable CD34+ cell count; iv) Colony forming unit (CFU)	4	4		3	1				ASTM 2944 indicates that CFU is a way to count stem cells	2
2	Maybe	Clinimmune (2012)		FDA SBRA: i) Total nucleated cells (TNC); ii) viability of total nucleated cells (TNC); iii) viable CD34+ cell count; iv) redacted	4	4	1	2.5	0.5					3
3	Maybe	Ducord (2012)		FDA SBRA: i) Total nucleated cells (TNC); ii) viable nucleated cells; iii) viable CD34+ cells (flow cytometry); iv) redacted; v) redacted	5	5	2	2.5	0.5					4
4	Maybe	Lifesouth (2013)		FDA SBRA: i) Total nucleated cells (TNC); ii) viable nucleated cells; iii) viable CD34+ cells (flow cytometry); iv) redacted	4	4	1	2.5	0.5					5
5	Maybe	Bloodworks (2016)		FDA SBRA: i) Total nucleated cells (TNC); ii) viable nucleated cells; iii) viable CD34+ cells (flow cytometry); iv) redacted	4	4	1	2.5	0.5					6
6	NO Fully Disclosed	Allocord (2016)		FDA SBRA: i) Total nucleated cells (TNC); ii) viable nucleated cells; iii) viable CD34+ cell count; iv) colony forming units (CFU)	4	4		3.5	0.5					7
7	Maybe	Clevecord (2016)		FDA SBRA: i) Total nucleated cell number; ii) viabitity of TNC; iii) viable CD34+ cell count; iv) redacted	4	4	1	2.5	0.5					8
8	NO Fully Disclosed	MD Anderson (2018)		FDA SBRA: i) Total CD34+ count; ii) total nucleated cell (TNC) count (per HPC, cord blood); iii) nucleated RBC; iv) viability of nucleated cells; v) viable CD34+ cells; vi) colony forming unit (CFU) assay	6	6		5	1
9	YES	Kymriah (2017)	T-cells reprogrammed to target cells that express specific surface antigens for treating cancers	FDA Panel Slides: i) CAR expression by flow cytometry; ii) release of IFNγ in response to CD19-expressing target cells	2	2			1	1			OTHER SOURCE: Novartis slides from panel discussion
10	YES	Yescarta (2017)		FDA SBRA: i) Cell viability; ii) anti-CD19 CAR expression; iii) redacted; Papadouli et al., 2020: Interferon-γ production by product upon stimulation with CD19+ cells	3	3		1	1	1			OTHER SOURCE: Papadouli et al., 2020
11	Maybe	Tecartus (2020)		FDA SBRA: i) Cell viability; ii) anti-CD19 CAR expression; iii) redacted	3	3	1	1	1
12	Maybe	Breyanzi (2021)		FDA SBRA: i) Redacted	1	1	1
13	YES	Abecma (2021)		FDA SBRA: i) Redacted; EMA Assessment Report: Interferon-γ production by product upon stimulation with BCMA+ cells	1	1				1			OTHER SOURCE: EMA Assessment Report
14	Maybe	Carvykti (2023)		FDA SBRA: i) CAR expression from viable T cells; ii) redacted	2	2	1	0.5	0.5
15	Maybe	Aucatzyl (2024)		FDA SBRA: i) Redacted	1	1	1
16	YES	Provenge (2010)	Autologous CD54+ cells activated with PAP-GM-CSF for prostate cancer	FDA SBRA: i) Number of CD54+ cells (flow cytometry); ii) increased expression of CD54 on the surface of antigen presenting cells after culture with PAP-GM-CSF (flow cytometry)	2	2		0.5	0.5	1
17	NO Fully Disclosed	Laviv (2011)	Autologous fibroblasts from skin punch biopsy for nasolabial fold wrinkles	FDA SBRA: i) Cell count; ii) cell viability; iii) collagen production by the cells	3	3		2	1
18	NO Fully Disclosed	Gintuit (2012)	Allogeneic cultured keratinocytes and fibroblasts in bovine collagen for gingival defects	FDA SBRA: Histology with morphological assessments: epidermal coverage, epidermal development, basal cell layer keratinocyte viability, suprabasal cell layer keratinocyte viability, dermal thickness, fibroblast density, and matrix integrity	1	1						1
19	Maybe	MACI (2016)	Autologous cultured chondrocytes on porcine collagen membrane for knee cartilage defects	FDA SBRA: i) Cell number; ii) redacted; iii) redacted; Rapko et al., 2007: PCR measurement of aggrecan gene expression	3	3	1	1	1				OTHER SOURCE: Vericel told me about their poster: Rapko et al., 2007: PCR measurement of aggrecan gene expression
20	Maybe	Stratagraft (2021)	Allogeneic cultured keratinocytes and dermal fibroblasts in murine collagen for thermal burns	FDA SBRA: Redacted	1	1	1
21	NO Fully Disclosed	Rethymic (2021)	Allogeneic processed thymus tissue for athymia	FDA SBRA: Histology-based (tissue organization, viability & retention of important cell types believed to be important for function)	1	1						1
22	Maybe	Zynteglo (2022)	Autologous CD34+ cells hematopoietic stem cells (HSCs) transduced to express βA-T87Q-globin for ß-thalassemia	FDA SBRA: i) Vector copy number (VCN) (qPCR); ii) percent LVV+ cells; iii) redacted; iv) redacted; v) colony forming cells (CFC); vi) βA-T87Q-globin quantitative protein expression	6	6	2	1	2		1
23	Maybe	Skysona (2022)	Autologous CD34+ hematopoietic stem cells (HSCs) transduced with adrenoleukodystrophy protein (ALDP) for cerebral adrenoleukodystrophy (CALD)	FDA SBRA: i) Vector copy number (VCN) (qPCR); ii) percent LVV+ cells; iii) redacted; iv) redacted; v) redacted; vi) percent ALDP+ cells	6	6	3		2		1
24	NO Fully Disclosed	Omisirge (2023)	Umbilical cord blood (UCB) cells cultured in nicotinamide to improve stemness for patients with hematologic malignancies having UCB transplantation	FDA SBRA: CD34+ cell fold-increase	1	1			1
25	YES	Lantidra (2023)	Allogeneic pancreatic islet cellular therapy for Type 1 diabetes	FDA Advisory Committee Meeting: i) Glucose Stimulation Index (GSI): ELISA (enzyme linked immunosorbent assay) quantification of insulin release by glucose stimulated islets; ii) Islet Yield: Dithizone (DTZ) stain and microscopic quantification; iii) Viability: SYTO 13 green/ethidium bromide staining and microscopic evaluation	3	3		2		1			OTHER SOURCE: Slides from panel discussion
26	Maybe	Casgevy (2023)	Autologous CD34+ HSCs gene edited to reduce BCL11A expression in erythroid lineage cells for treating ß-thalassemia in children	i) On-target editing frequency (tracking of indels by decomposition, TIDE); ii) redacted; iii) redacted.	3	3	2				1
27	Maybe	Lyfgenia (2023)	Autologous HSCs containing functional copies of a modified β-globin gene for sickle cell disease	i) Vector copy number (VCN); ii) redacted, iii) redacted; iv) redacted; v) redacted; vi) βA-T87Q-globin quantitative protein expression.	6	6	4		1		1
28	Maybe	Amtagvi (2024)	Autolologous T-cell therapy made of ex vivo-expanded lymphocytes harvested from patient tumors for melanoma	i) redacted, ii) redacted, iii) redacted, iv) redacted, v) dose (total viable cells), vi) redacted and vii) redacted.	7	7	6	1
29	Maybe	Lenmeldy (2024)	Autologous HSCs expressing the human arylsulfatase (ARSA) gene for treating metachromatic leukodystrophy in children	i) viability (%); ii) vector copy number; iii) vector copy number (calculation); iv) transduction efficiency; v) transgene function (arylsulfatase A (ARSA) activity); vi) redacted; vii) redacted; viii) redacted	8	8	3	1	2		2
30	YES	Tecelra (2024)	Autologous T cells genetically modified with lentiviral vector to express a T cell receptor (TCR) specific for human MAGE-A4 for treating synovial sarcoma	i) Cytotoxic activity (cytotoxicity assay with flow cytometry)	1	1				1
31	YES	Ryoncil (2024)	Culture-expanded mesenchymal stromal cells (MSCs) isolated from the bone marrow of healthy human adult donors	i) interleukin-2 receptor alpha (IL-2Rα) inhibition bioassay; ii) redacted; iii) cell viability; iv) cell concentration	4	4	1	2		1			Other Source: FDA Document, BLA Clinical and Clinical Pharmacology Review and Evaluation, BLA 125706/0, Ryoncil, FDA. Accessed January 27, 2025: https://www.fda.gov/vaccines-blood-biologics/cellular-gene-therapy-products/ryoncil
				sum	104	104	33	37	19	7	6	2
				mean	3.35484
				Stdev	1.99246
				count (n)	31		18	19	20	7	5	2
				first quartile	1.5
				median	3
				third quartile	4
				percent of the 99 slots that are in this category		1	0.317308	0.355769	0.182692	0.0673077	0.0576923	0.0192308
				percent of CTPs that cite the potency test		2.29032	0.580645	0.612903	0.645161	0.225806	0.16129	0.0645161
